# Supplementary material for: Oxidative stress and information content of black and yellow plumage coloration: an experiment with greenfinches
Source: Oxford University Press journal article supplement (doi:10.1242/jeb.042085), 2010-06-11
Supplement: jeb042085-sup-042085tables1.pdf [file jeb042085-sup-042085tables1.pdf]

Table S1. Parameter oxidative status and plumage coloration of greenfinches in four different experimental groups at first and second blood sampling

|                                       | First sampling |            |            |    | Second sampling |             |            |    |
|---------------------------------------|----------------|------------|------------|----|-----------------|-------------|------------|----|
|                                       | Mean           | 95% CI     | Min.-max.  | N  | Mean            | 95% CI      | Min.-max.  | N  |
| CAR-                                  |                |            |            |    |                 |             |            |    |
| BSO-                                  |                |            |            |    |                 |             |            |    |
| GSH ( $\mu\text{mol g}^{-1}$ )        | 0.95           | 0.881–1.02 | 0.76–1.21  | 13 | 0.93            | 0.86–1.01   | 0.71– 1.10 | 14 |
| MDA ( $\mu\text{mol l}^{-1}$ )        | 5.10           | 4.34–5.87  | 3.68–6.89  | 11 | 5.01            | 4.51–5.50   | 3.77–6.18  | 12 |
| TAC ( $\text{mmol l}^{-1}$ )          | 0.66           | 0.58–0.73  | 0.37–0.84  | 13 | 0.74            | 0.66–0.81   | 0.49–0.916 | 13 |
| Carotenoids ( $\mu\text{g ml}^{-1}$ ) | 5.05           | 1.55–8.54  | 0.00–22.34 | 13 | 4.60            | 0.58–8.61   | 0.00–27.67 | 15 |
| Brightness of black                   | 3298.7         | 2733–3865  | 1851–4925  | 14 | 2990            | 2319–3661   | 1142–6266  | 14 |
| Chroma of yellow                      | 0.25           | 0.23–0.27  | 0.18–0.29  | 14 | 0.12            | 0.11–0.14   | 0.07–0.17  | 14 |
| CAR+                                  |                |            |            |    |                 |             |            |    |
| BSO-                                  |                |            |            |    |                 |             |            |    |
| GSH ( $\mu\text{mol g}^{-1}$ )        | 0.92           | 0.84–1.01  | 0.66–1.23  | 15 | 1.01            | 0.95–1.07   | 0.80–1.24  | 17 |
| MDA ( $\mu\text{mol l}^{-1}$ )        | 5.08           | 4.56–5.60  | 3.74–6.43  | 14 | 4.79            | 4.05–5.54   | 3.04–6.91  | 13 |
| TAC ( $\text{mmol l}^{-1}$ )          | 0.74           | 0.67–0.81  | 0.50–0.98  | 16 | 0.74            | 0.67–0.80   | 0.54–0.99  | 15 |
| Carotenoids ( $\mu\text{g ml}^{-1}$ ) | 19.82          | 9.42–30.22 | 0.00–60.98 | 16 | 24.79           | 16.68–32.90 | 0.00–53.10 | 16 |
| Brightness of black                   | 3175           | 2689–3662  | 2338–5131  | 14 | 2445            | 2079–2810   | 1523–4322  | 12 |
| Chroma of yellow                      | 0.25           | 0.23–0.26  | 0.19–0.28  | 14 | 0.21            | 0.16–0.25   | 0.09–0.35  | 14 |
| CAR-                                  |                |            |            |    |                 |             |            |    |
| BSO+                                  |                |            |            |    |                 |             |            |    |
| GSH ( $\mu\text{mol g}^{-1}$ )        | 0.89           | 0.83–0.95  | 0.73–1.04  | 15 | 0.64            | 0.58–0.69   | 0.51–0.81  | 13 |
| MDA ( $\mu\text{mol l}^{-1}$ )        | 5.08           | 4.34–5.81  | 3.09–8.16  | 15 | 5.53            | 4.66–6.41   | 3.92–7.85  | 12 |
| TAC ( $\text{mmol l}^{-1}$ )          | 0.74           | 0.65–0.84  | 0.32–1.15  | 15 | 0.75            | 0.69–0.81   | 0.57–0.87  | 12 |
| Carotenoids ( $\mu\text{g ml}^{-1}$ ) | 6.92           | 3.39–10.46 | 0.00–26.82 | 15 | 4.87            | 0.34–9.40   | 0.00–21.54 | 13 |
| Brightness of black                   | 3009           | 2705–3313  | 2234–3679  | 12 | 2298            | 1736–2860   | 1459–4906  | 12 |
| Chroma of yellow                      | 0.26           | 0.23–0.28  | 0.19–0.34  | 12 | 0.14            | 0.11–0.17   | 0.09–0.19  | 12 |
| CAR+                                  |                |            |            |    |                 |             |            |    |
| BSO+                                  |                |            |            |    |                 |             |            |    |
| GSH ( $\mu\text{mol g}^{-1}$ )        | 0.93           | 0.86–0.99  | 0.65–1.11  | 15 | 0.57            | 0.50–0.63   | 0.44–0.86  | 13 |
| MDA ( $\mu\text{mol l}^{-1}$ )        | 5.14           | 4.38–5.89  | 2.05–7.66  | 14 | 5.63            | 5.22–6.04   | 4.38–6.51  | 13 |
| TAC ( $\text{mmol l}^{-1}$ )          | 0.84           | 0.76–0.92  | 0.51–1.06  | 15 | 0.78            | 0.71–0.84   | 0.58–0.91  | 12 |
| Carotenoids ( $\mu\text{g ml}^{-1}$ ) | 15.98          | 8.19–23.77 | 0.00–41.79 | 15 | 16.12           | 10.66–21.57 | 0.00–29.80 | 15 |
| Brightness of black                   | 3211           | 2770–3625  | 2072–4385  | 14 | 2220            | 1936–2504   | 1469–3264  | 14 |
| Chroma of yellow                      | 0.26           | 0.24–0.28  | 0.21–0.31  | 14 | 0.18            | 0.15–0.21   | 0.10–0.31  | 14 |

BSO stands for buthionine sulfoximine. GSH stands for glutathione. MDA stands for malondialdehyde. TAC stands for total antioxidant capacity.
